# Supplementary material for: The long-term impact of transgressing planetary boundaries on biophysical atmosphere-land interactions
Source: Copernicus journal article supplement (doi:10.5194/egusphere-2023-2133), 2023-10-05
Supplement: Supplementary file 1 [file egusphere-2023-2133-supplement.pdf]

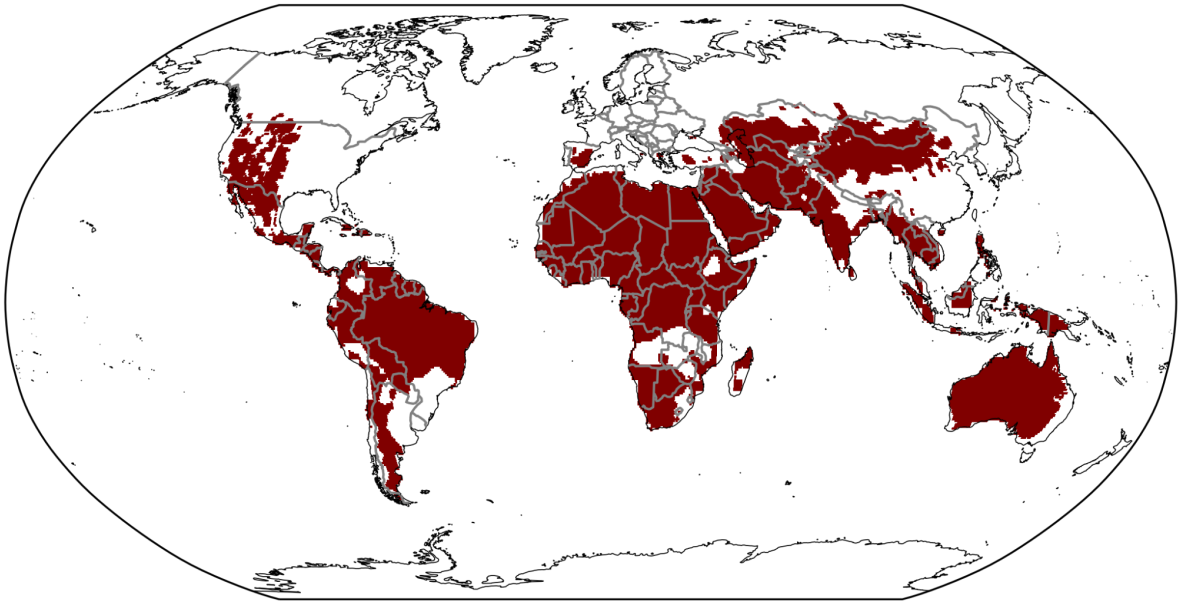

**Figure S1.** Tropical ecosystems according to Köppen and Geiger (Kottek et al. 2006)

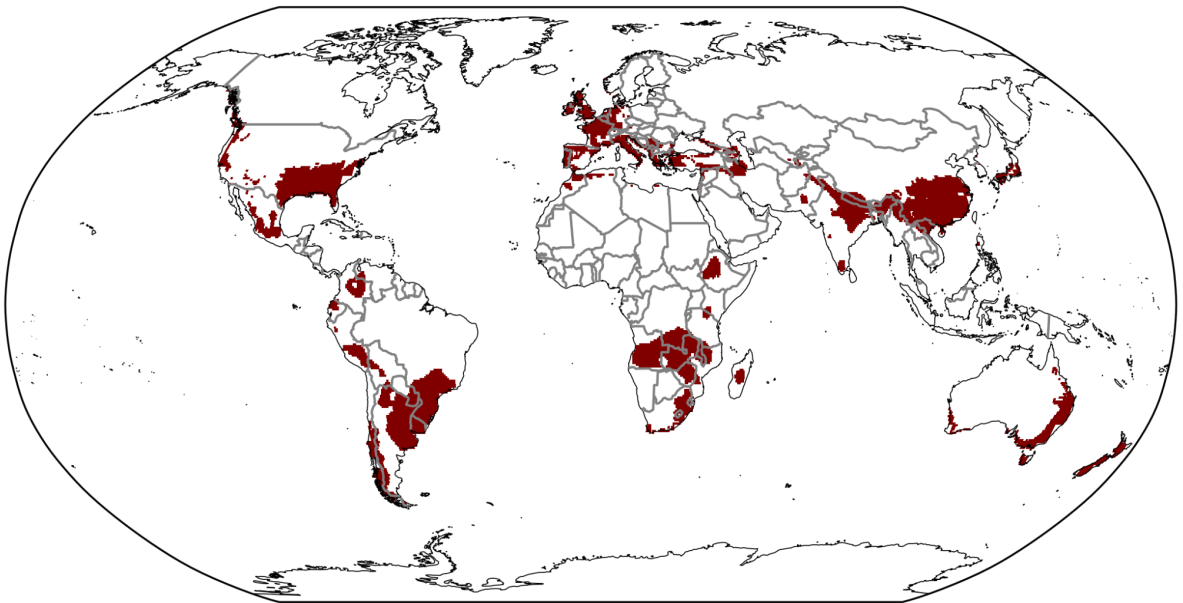

**Figure S2.** Temperate ecosystems according to Köppen and Geiger (Kottek et al. 2006)

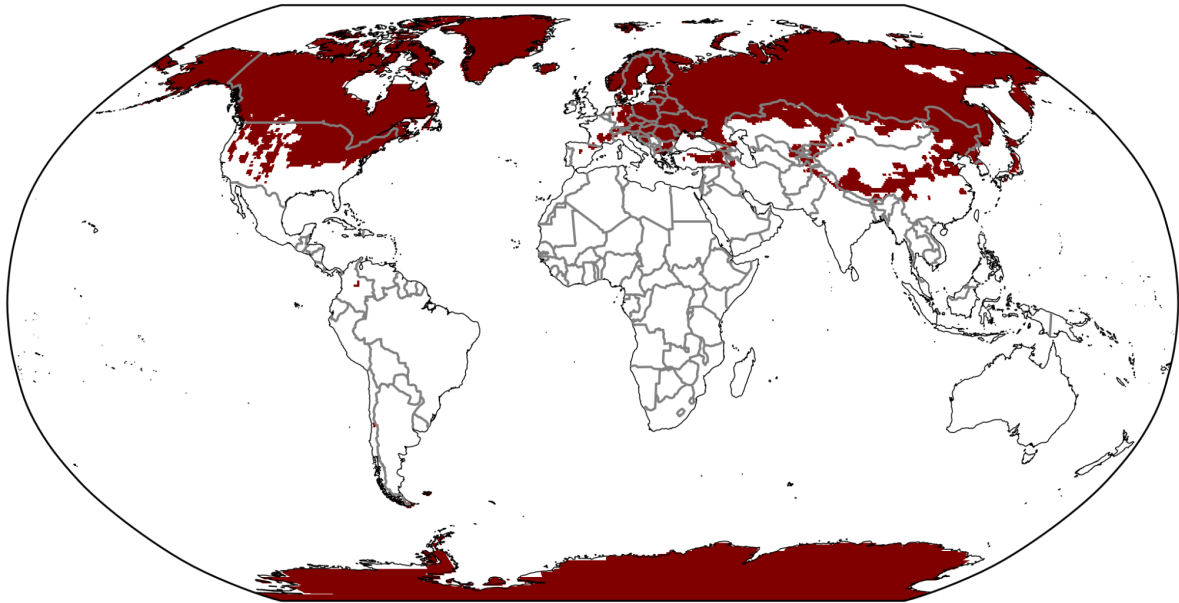

**Figure S3.** Boreal ecosystems according to Köppen and Geiger (Kottek et al. 2006)

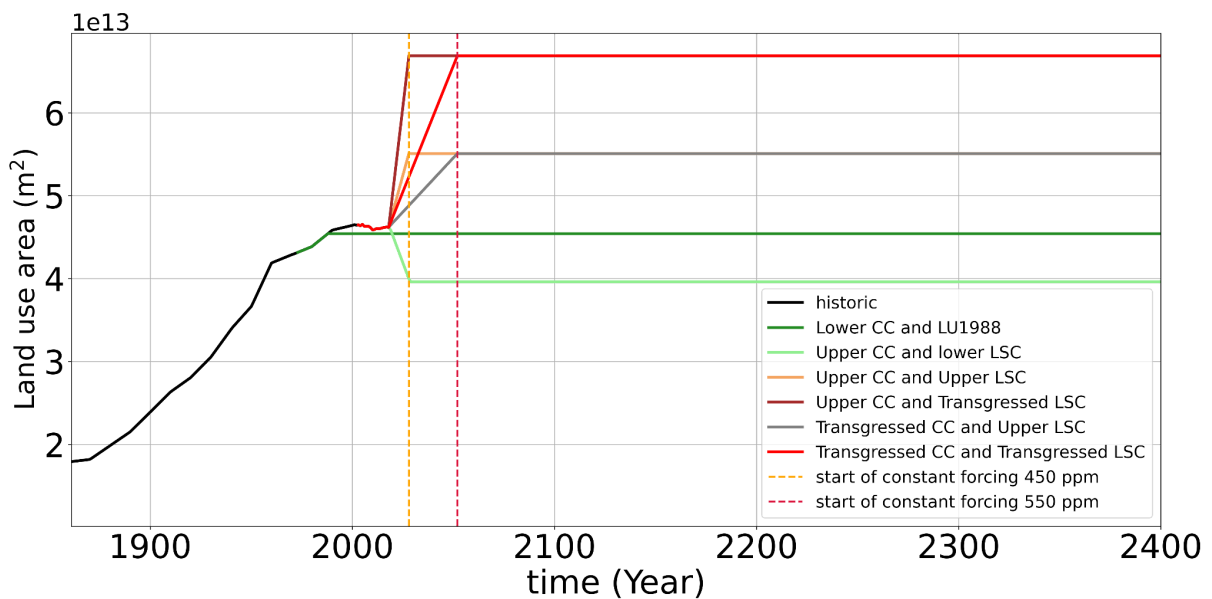

**Figure S4.** Land use area for the historic period and the different scenarios. For the LU1988 experiment, land use is constant from 1988. For all Upper CC experiments, land use is constant from 2029 and for all Transgressed CC experiments, land us is constant from 2052.

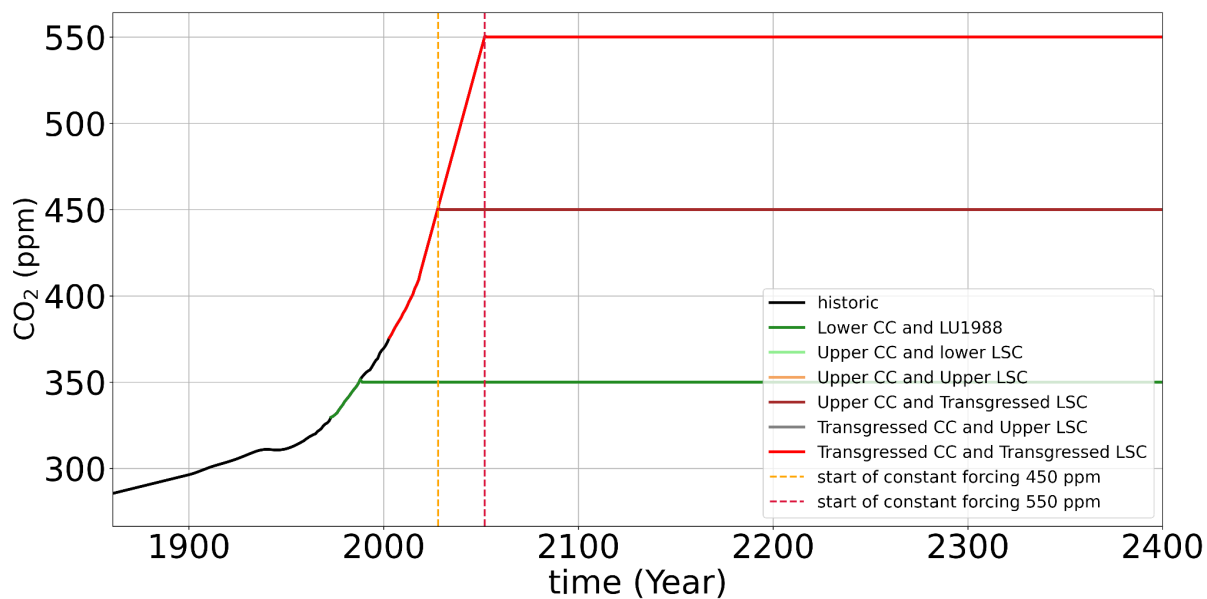

**Figure S5.** Atmospheric CO<sub>2</sub> concentration for the historic period and the different scenarios. For the Lower CC experiment, CO<sub>2</sub> is constant from 1988 at 350 ppm. For all Upper CC experiments, CO<sub>2</sub> is constant from 2029 at 450 ppm and for all Transgressed CC experiments, land us is constant from 2052 at 550 ppm.

| Zone      | Continent | Current natural land | Lower LSC | Upper LSC | Transgressed LSC |
|-----------|-----------|----------------------|-----------|-----------|------------------|
| Temperate | Africa    | 0.35                 | 0.5       | 0.3       | 0.2              |
| Temperate | America   | 0.48                 | 0.5       | 0.3       | 0.2              |
| Temperate | Asia      | 0.59                 | 0.5       | 0.3       | 0.2              |
| Temperate | Europe    | 0.47                 | 0.5       | 0.3       | 0.2              |
| Temperate | Oceania   | 0.66                 | 0.5       | 0.3       | 0.2              |
| Boreal    | America   | 0.86                 | 0.85      | 0.6       | 0.4              |
| Boreal    | Asia      | 0.79                 | 0.85      | 0.6       | 0.4              |
| Boreal    | Europe    | 0.78                 | 0.85      | 0.6       | 0.4              |
| Tropical  | Africa    | 0.63                 | 0.85      | 0.6       | 0.4              |
| Tropical  | America   | 0.73                 | 0.85      | 0.6       | 0.4              |
| Tropical  | Asia      | 0.63                 | 0.85      | 0.6       | 0.4              |
| Tropical  | Oceania   | 0.4                  | 0.85      | 0.6       | 0.4              |

**Tab. S1.** Current fraction of natural land for the major climate zones on different continents and their respective lower, upper, and transgressed planetary boundaries.
